# Supplementary material
Source: PubMed Central journal article supplement (PMC9437013)
Supplement: 41467_2022_32389_MOESM1_ESM.pdf [file 41467_2022_32389_MOESM1_ESM.pdf]

## **Supplementary Information**

### **Efficient mucosal antibody response to SARS-CoV-2 vaccination is induced in previously infected individuals**

**Supplementary Figures 1-6**

**Supplementary Tables 1-3**

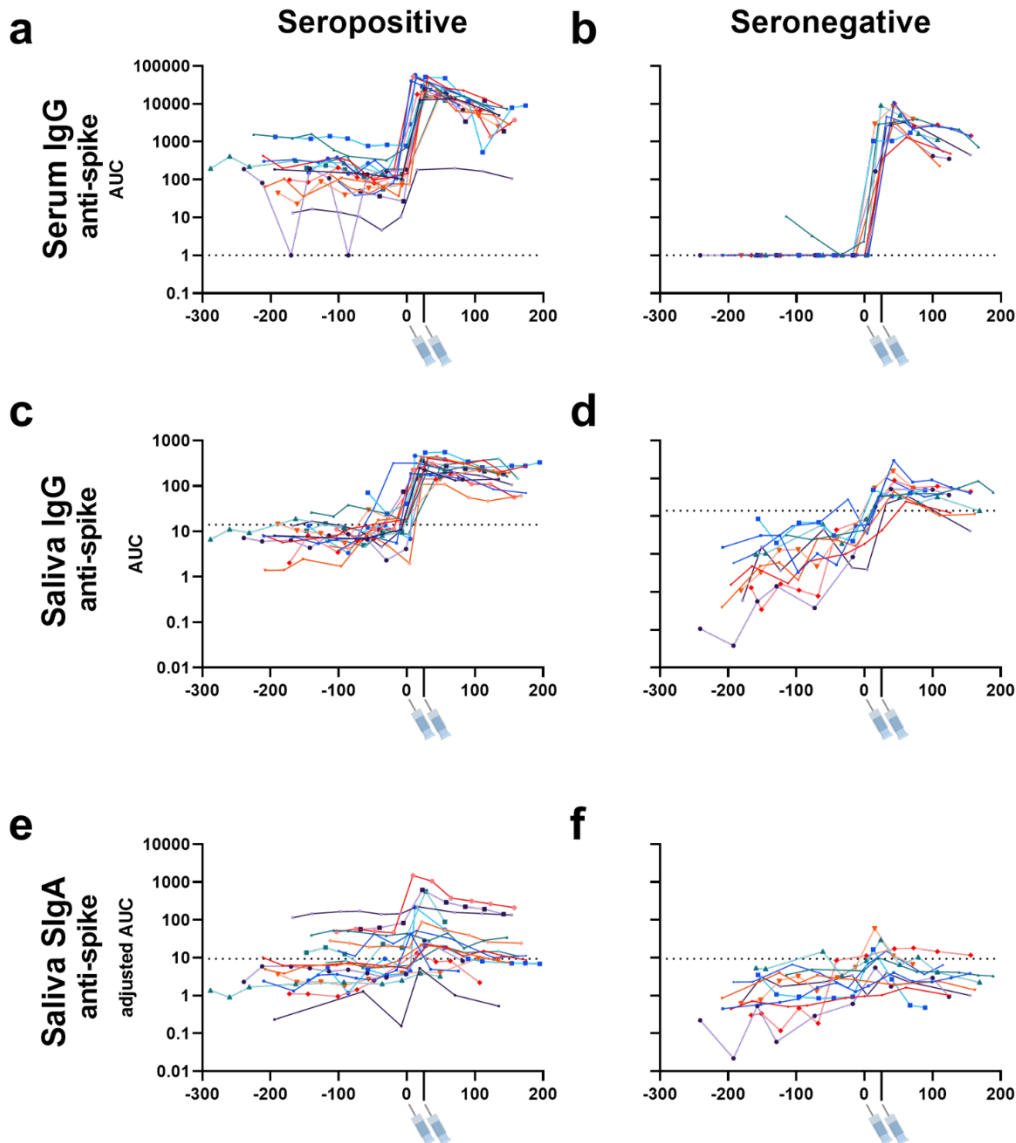

**Supplementary Figure 1. Time course of vaccine-induced serum and mucosal anti-SARS-CoV-2 antibody titers in adult participants with or without previous SARS-CoV-2 infection.**

Anti-SARS-CoV-2 spike IgG titers in serum (a, b), anti-SARS-CoV-2 spike IgG titers in saliva (c, d), and anti-SARS-CoV-2 spike SIgA titers in saliva (e, f) collected from 18 individuals with previous SARS-CoV-2 infection (seropositive) and 11 individuals without previous SARS-CoV-2 infection (seronegative) prior to and after vaccination. 6~13 different timepoints were assessed per individual. X-axis values represent days post first vaccination and Y-axis values represent antibody titers calculated as AUC (area under the curve). Syringe symbols point to the approximate time when the first and second vaccine dose were administered (28 days for Moderna mRNA-1273 vaccine and 21 days for the Pfizer-BioNTech BNT162b2 vaccine). Dotted lines are cut off values (mean+3SD of the AUC of samples from pre-vaccinated seronegative individuals). Different colors represent different individuals. Source data are provided as a Source Data file.

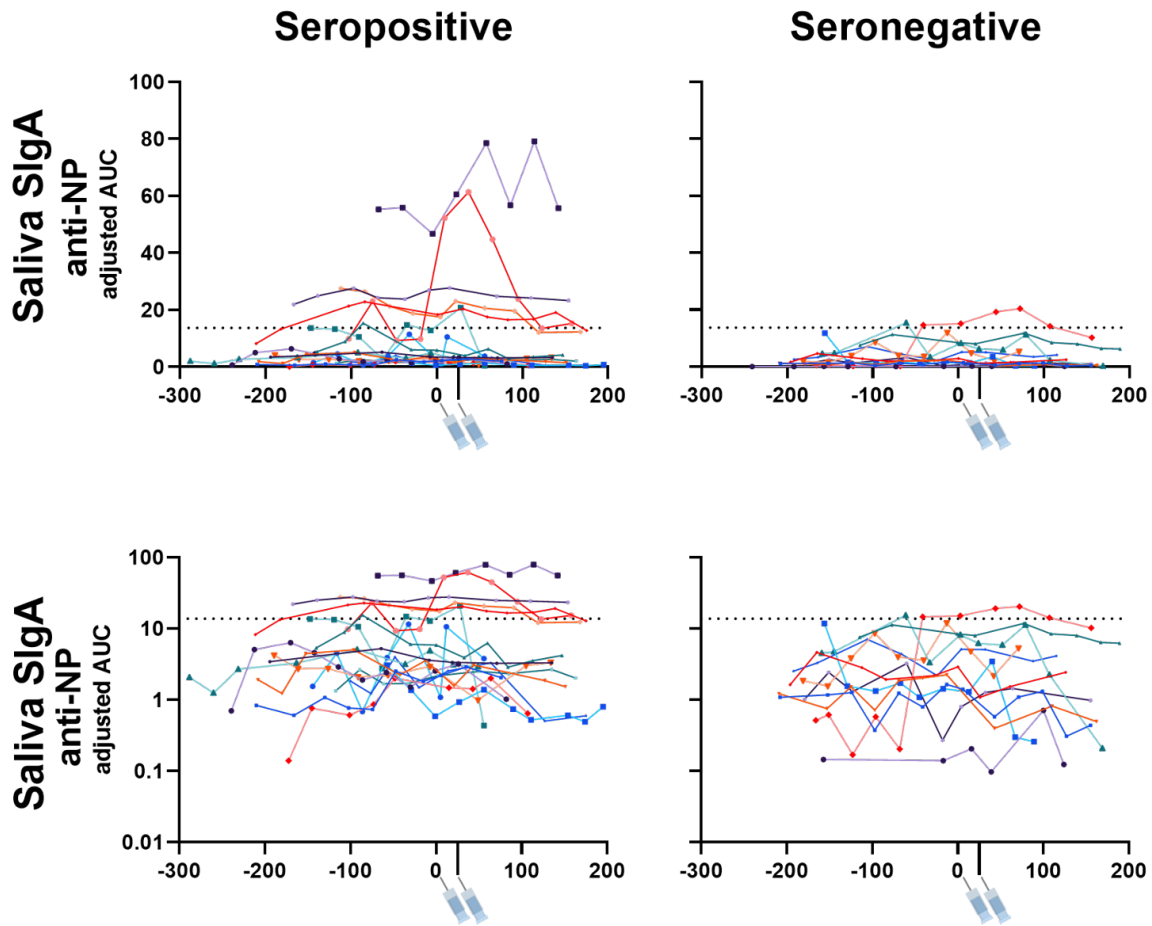

**Supplementary Figure 2. Mucosal antibody response to SARS-CoV-2 NP in humans with or without previous SARS-CoV-2 infection.**

Anti-SARS-CoV-2 NP SIgA titers in saliva collected from 18 individuals with previous SARS-CoV-2 infection (seropositive) and 11 individuals without previous SARS-CoV-2 infection (seronegative) prior to and after vaccination. 6~13 different timepoints were assessed per individual. X-axis values are days post first vaccination and Y-axis values are antibody titers calculated as AUC (area under the curve). Data is presented in linear and logarithmic scale in top and bottom panels, respectively. Syringe symbols point to the approximate time when the first and second vaccine dose was administered (28 days for Moderna mRNA-1273 vaccine and 21 days for the Pfizer-BioNTech BNT162b2 vaccine). The dotted line indicates the cut-off value (mean+3SD of the AUC of samples from pre-vaccinated seronegative individuals). Source data are provided as a Source Data file.

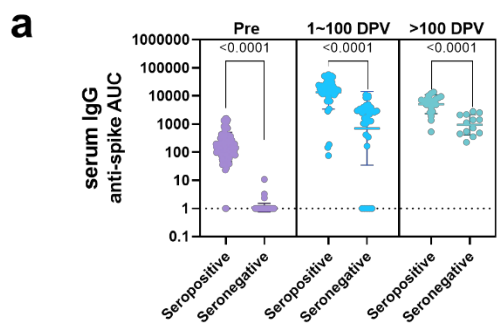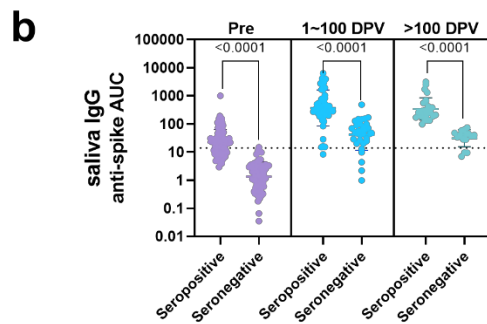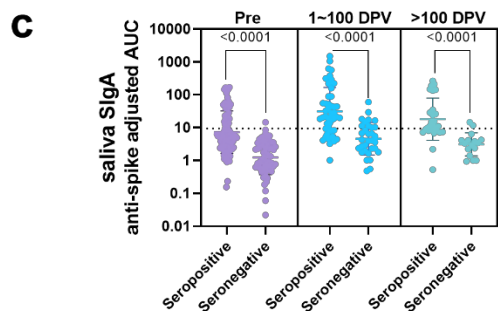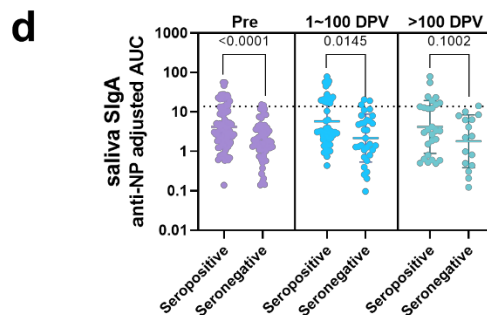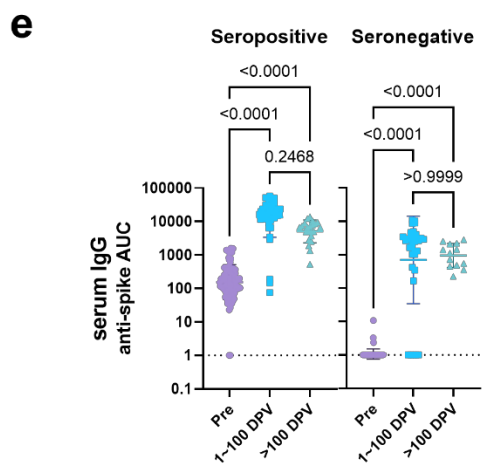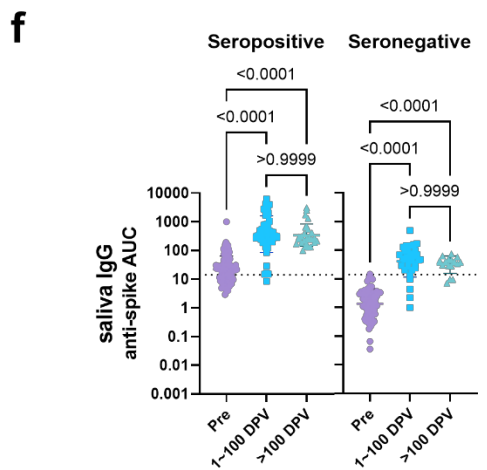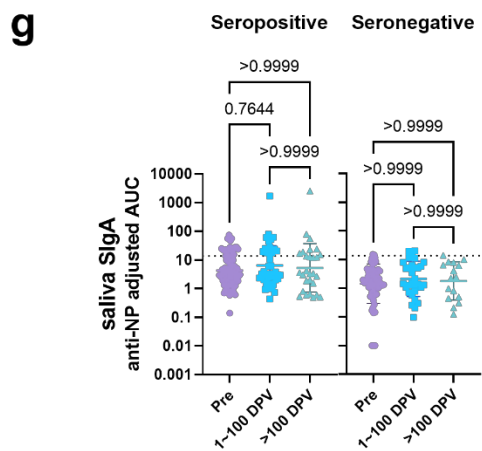

### **Supplementary Figure 3. Comparison of serum and mucosal antibody titers between different timepoints.**

Comparison of anti-SARS-CoV-2 spike IgG titers in serum (a), anti-SARS-CoV-2 spike IgG titers in saliva (b), anti-SARS-CoV-2 spike SIgA titers in saliva (c), and anti-SARS-CoV-2 NP SIgA titers in saliva (d) between samples collected from seropositive and seronegative individuals. Samples were separated into three groups: those collected prior to first vaccination (Pre, purple), at 1~100 days post first vaccination (1~100 DPV, blue), and after 100 days post first vaccination (>100 DPV, green) (Mann-Whitney test, p value (two-tailed) above bracket). Comparison of anti-SARS-CoV-2 spike IgG titers in serum (e), anti-SARS-CoV-2 spike IgG titers in saliva (f), and anti-SARS-CoV-2 NP SIgA titers in saliva (g) between samples collected during the three different timepoints. Dotted lines are cut off values (mean+3SD of the AUC of samples from pre-vaccinated seronegative individuals). For the seropositive group, 170 serum samples (101 in Pre, 47 in 1~100 DPV, and 22 in >100 DPV) and 166 saliva samples (90 in Pre, 49 in 1~100 DPV, and 27 in >100 DPV) collected from 18 individuals were included in the analysis. For the seronegative group, 108 serum samples (63 in Pre, 32 in 1~100 DPV, and 13 in >100 DPV) and 110 saliva samples (62 in Pre, 32 in 1~100 DPV, and 16 in >100 DPV) collected from 11 individuals were included in the analysis. Data is presented in scatter plots with geometric mean with geometric SD. (One-way ANOVA with Kruskal-Wallis test, p values above brackets). Y-axis values are antibody titers calculated as AUC (area under the curve). Source data are provided as a Source Data file.

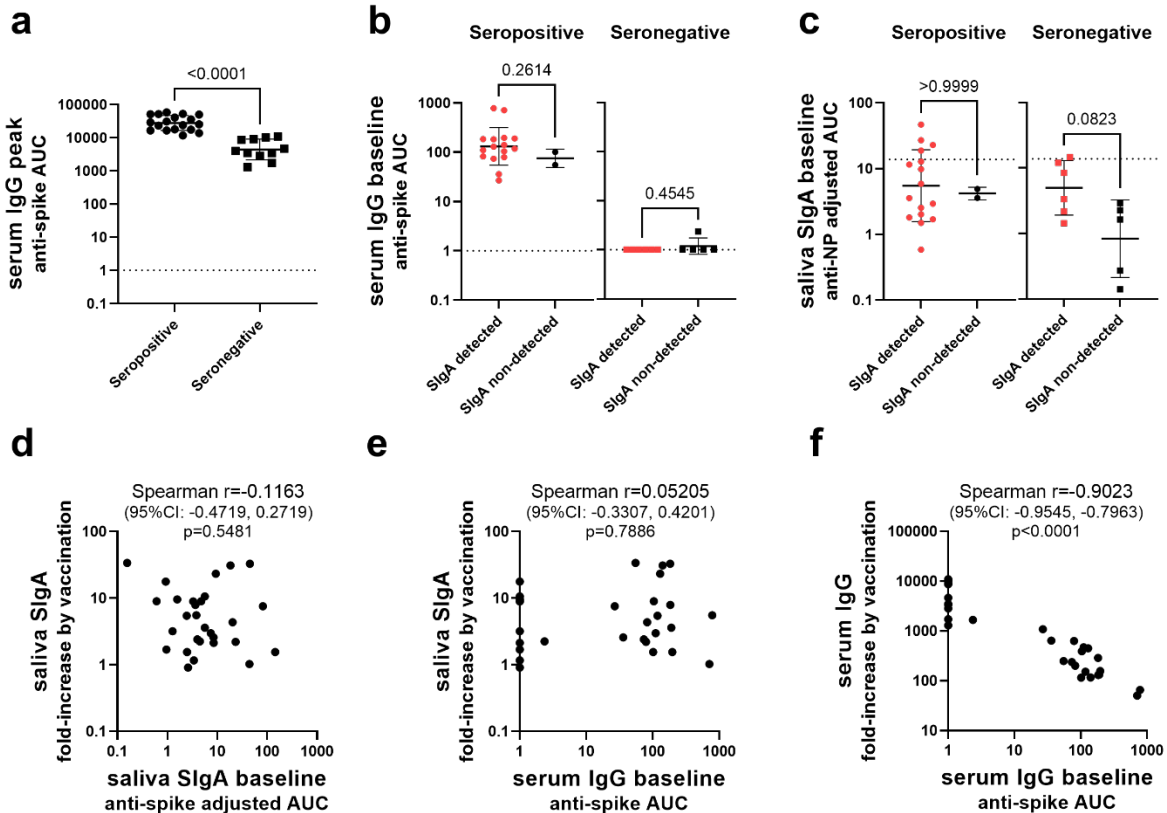

### Supplementary Figure 4. Analyses of antibody response to vaccination in the context of pre-existing antibody titers

(a) Comparison of peak anti-SARS-CoV-2 spike serum IgG titers between 16 seropositive individuals and 11 seronegative individuals post vaccination (Mann-Whitney test, p value (two-tailed) above bracket). Data is presented in scatter plots with geometric mean with geometric SD. The dotted line indicates the cut-off value. (b, c) Comparison of anti-SARS-CoV-2 spike IgG titers in serum (b) and anti-NP SIgA titers in saliva (c) of samples collected on the nearest possible date before vaccination (baseline) between individuals who presented mucosal anti-spike SIgA antibody titers above the cut-off value SIgA detected (16 in seropositive group and 6 in seronegative group) and those who did not SIgA non-detected (2 in seropositive group and 6 in seronegative group) in seropositive and seronegative individuals (Mann-Whitney test, p values (two-tailed) above brackets). Data is presented in scatter plots with geometric mean with geometric SD. The dotted lines indicate the cut-off value (mean+3SD of the AUC of all samples collected from pre-vaccinated seronegative individuals for c). (d) Correlation analysis between baseline saliva SIgA titer and fold increase (peak antibody titer divided by baseline antibody titer) in saliva SIgA titer of the 18 seropositive and 11 seronegative individuals. Spearman correlation coefficient and p values (two-tailed) are labeled above graph. (e) Correlation analysis between baseline serum IgG titer and fold increase (peak antibody titer divided by baseline antibody titer) in saliva SIgA titer of the 18 seropositive and 11 seronegative individuals. Spearman correlation coefficient and p values (two-tailed) are labeled above graph. (f) Correlation analysis between baseline serum IgG titer and fold increase (peak antibody titer divided by baseline antibody titer) in serum IgG titer of the 18 seropositive and 11 seronegative individuals. Spearman correlation coefficient and p values (two-tailed) are labeled above graph. Source data are provided as a Source Data file.

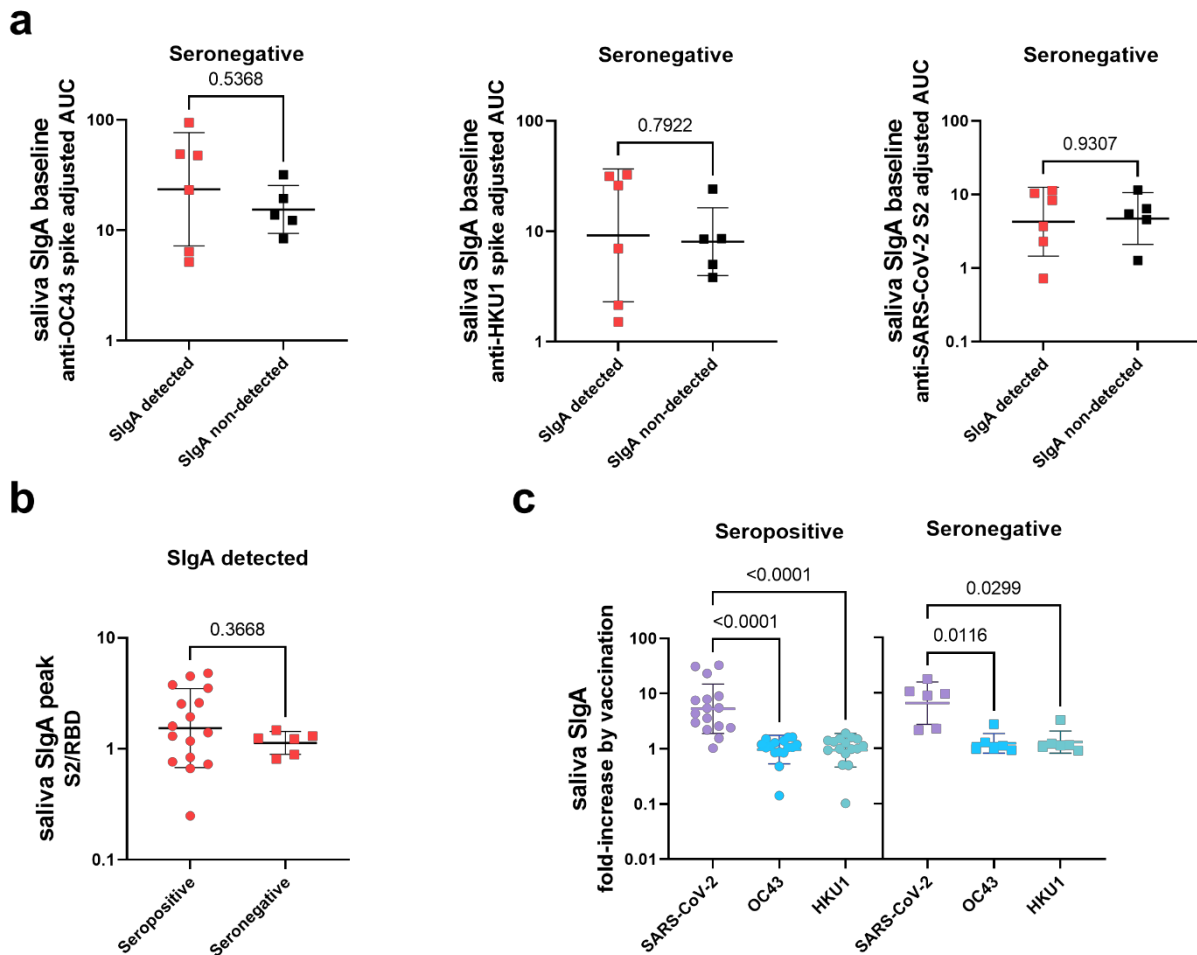

**Supplementary Figure 5. Analyses of vaccine induced antibody binding to the spike proteins of betacoronaviruses HCoV-OC43 and HCoV-HKU1, and the antigenically conserved SARS-CoV-2 S2 domain**

(a) Comparison of baseline anti-HCoV-OC43 spike (left panel), anti-HCoV-HKU1 spike (middle panel), and anti-SARS-CoV-2 spike S2 domain (right panel) reactivity between 6 SlgA induced and 5 SlgA non-induced seronegative individuals (Mann-Whitney test, p values (two-tailed) above brackets). (b) Comparison of peak saliva SlgA S2/RBD antibody ratio (calculated by dividing anti-SARS-CoV-2 S2 SlgA adjusted AUC by anti-SARS-CoV-2 RBD SlgA adjusted AUC) between 16 seropositive and 6 seronegative individuals who successfully induced SlgA in response to vaccination (Mann-Whitney test, p value (two-tailed) above bracket). (c) Comparison of fold increase in anti-SARS-CoV-2, anti-HCoV-OC43, and anti-HCoV-HKU1 SlgA titers in saliva by vaccination in 16 seropositive and 6 seronegative individuals who successfully induced SlgA in response to vaccination (One-way ANOVA with Kruskal-Wallis test, p values above brackets). Fold increase was calculated by dividing peak SlgA adjusted AUC by baseline SlgA adjusted AUC. All data is presented in scatter plots with geometric mean with geometric SD. Source data are provided as a Source Data file.

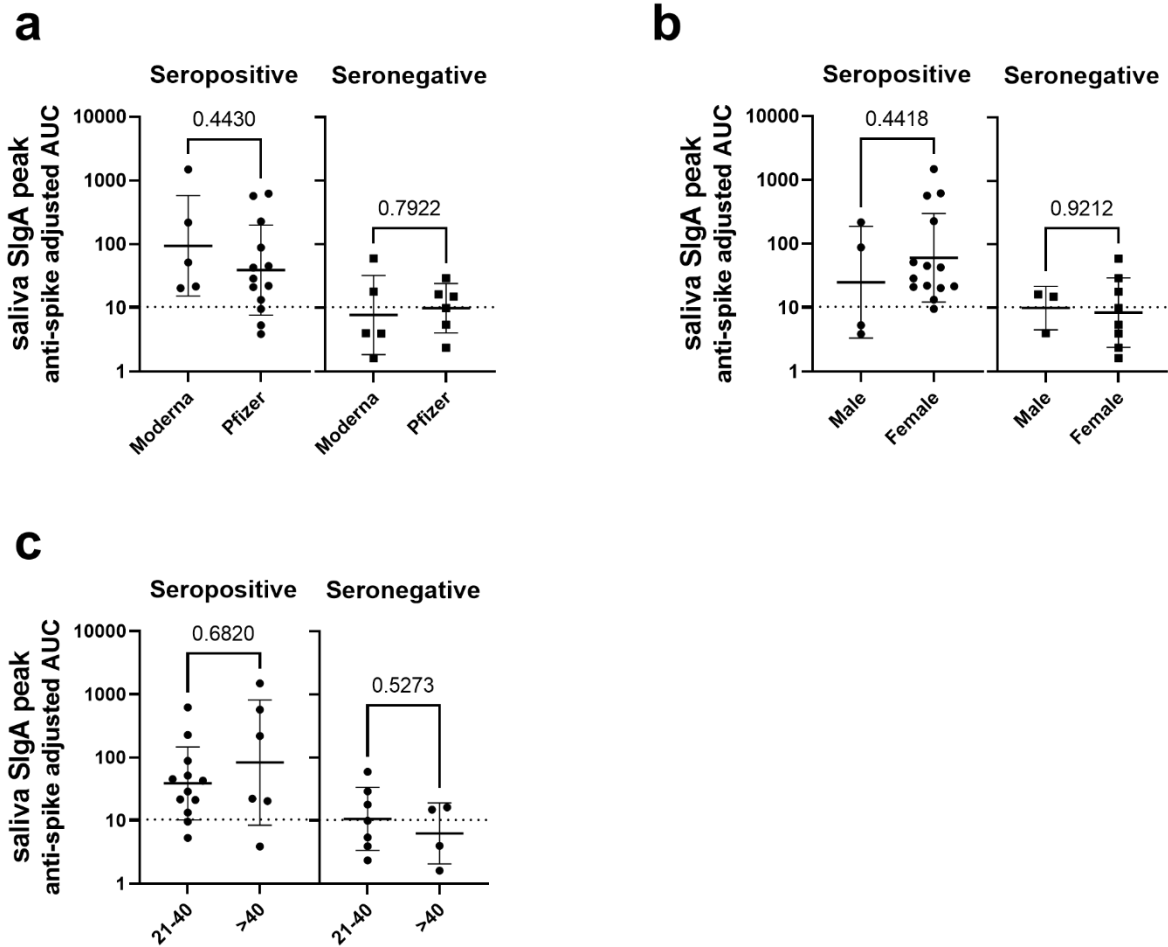

**Supplementary Figure 6. Analyses of antibody response to vaccination in the context of demographics of study participants.**

(a) Comparison of peak anti-SARS-CoV-2 spike SIgA titers between recipients of the Moderna mRNA-1273 vaccine (Moderna, 5 in seropositive group and 5 in seronegative group) and the Pfizer-BioNTech BNT162b2 vaccine (Pfizer, 13 in seropositive group and 6 in seronegative group) in seropositive and seronegative individuals (Mann-Whitney test, p values (two-tailed) above brackets). (b) Comparison of peak anti-SARS-CoV-2 spike SIgA titers between male (4 in seropositive group and 3 in seronegative group) and female (14 in seropositive group and 8 in seronegative group) individuals (Mann-Whitney test, p values (two-tailed) above brackets). (c) Comparison of peak anti-SARS-CoV-2 spike SIgA titers between age (Mann-Whitney test, p values (two-tailed) above brackets). Individuals were largely sorted into two age groups: 21~40 (12 in seropositive group and 7 in seronegative group) and >40 (6 in seropositive group and 4 in seronegative group). The dotted line indicates the cut-off value (mean+3SD of the AUC of all samples collected from pre-vaccinated seronegative individuals). All data is presented in scatter plots with geometric mean with geometric SD. Source data are provided as a Source Data file.



**Supplementary Table 1. Comparison of statistical difference between seropositive and seronegative groups**

|                                            | Seropositive (N=18)     | Seronegative (N=11)     | p value (two-tailed) |
|--------------------------------------------|-------------------------|-------------------------|----------------------|
| Sex (Male/Female)                          | 4/14                    | 3/8                     | >0.9999              |
| Vaccine (Pfizer/Moderna)                   | 13/5                    | 6/5                     | 0.4320               |
| Age (Average <Min, Max>)                   | 34.9 <21, 46>           | 40.6 <26, 62>           | 0.209                |
| Serum samples (n, Average DPV <Min, Max>)  | 170, -28.08 <-288, 174> | 109, -30.24 <-241, 167> | 0.7977               |
| Saliva samples (n, Average DPV <Min, Max>) | 166, -16.31 <-288, 195> | 110, -24.15 <-241, 189> | 0.4984               |

DPV: Days post first vaccine. Fisher's exact test for analyses of sex and vaccine type distribution. Mann-Whitney test for analyses of age and sample collection timepoint distribution. Source data are provided as a Source Data file.

**Supplementary Table 2. Demographics of seropositive study participants and SIgA detection status**

| Participant number | Age   | Sex    | Vaccine type | SIgA detection after vaccination | Sample collection timepoints in day post first vaccine (*Serum collection only **Saliva collection only) |        |        |       |       |       |     |        |        |        |     |     |        |        |
|--------------------|-------|--------|--------------|----------------------------------|----------------------------------------------------------------------------------------------------------|--------|--------|-------|-------|-------|-----|--------|--------|--------|-----|-----|--------|--------|
|                    |       |        |              |                                  | -194                                                                                                     | -64    | -8     | 19    | 71    | 135   |     |        |        |        |     |     |        |        |
| 1                  | 36-40 | Male   | Pfizer       | non-detected                     | -194                                                                                                     | -64    | -8     | 19    | 71    | 135   |     |        |        |        |     |     |        |        |
| 2                  | 31-35 | Female | Pfizer       | detected                         | -210                                                                                                     | -166   | -130   | -102  | -74   | -47   | -15 | 6      | 35     | 76     |     |     |        |        |
| 4                  | 31-35 | Female | Pfizer       | detected                         | -225 *                                                                                                   | -168 * | -140   | -107  | -86   | -30   | 0   | 33     | 60     | 84     | 113 | 147 |        |        |
| 5                  | 21-25 | Female | Moderna      | detected                         | -208                                                                                                     | -180   | -152   | -96   | -42   | -12   | 21  | 44     | 72 *   | 127    | 151 |     |        |        |
| 6                  | 41-45 | Female | Pfizer       | detected                         | -211                                                                                                     | -182   | -103   | -84   | -50 * | -29 * | 1   | 31     | 59     | 83     | 113 | 139 | 175 ** |        |
| 9                  | 31-35 | Female | Pfizer       | detected                         | -239                                                                                                     | -212   | -170   | -142  | -114  | -86   | -58 | -30    | -1     | 26     | 82  |     |        |        |
| 11                 | 31-35 | Female | Pfizer       | detected                         | -193 *                                                                                                   | -141 * | -113 * | -87 * | -57   | -29   | -1  | 27     | 56     | 90     | 111 | 154 | 174    | 195 ** |
| 14                 | 41-45 | Male   | Pfizer       | non-detected                     | -288                                                                                                     | -260   | -231   | -163  | -92   | -36   | -7  | 20     | 49 **  |        |     |     |        |        |
| 16                 | 36-40 | Female | Pfizer       | detected                         | -189                                                                                                     | -161   | -126   | -91   | -56   | -35 * | -7  | 49     | 105    | 134    |     |     |        |        |
| 17                 | 31-35 | Female | Pfizer       | detected                         | -172                                                                                                     | -145   | -101   | -73   | -48   | -18 * | 15  | 43     | 64     | 107    |     |     |        |        |
| 21                 | 21-25 | Female | Pfizer       | detected                         | -167                                                                                                     | -139   | -97    | -69   | -37   | -9    | 15  | 70     | 110    | 154 ** |     |     |        |        |
| 23                 | 31-35 | Female | Moderna      | detected                         | -100                                                                                                     | -76    | -48    | -20   | 14    | 64    | 127 | 175 ** |        |        |     |     |        |        |
| 24                 | 46-50 | Female | Moderna      | detected                         | -117                                                                                                     | -89    | -61    | -33   | 2     | 51    | 85  | 135    | 163 ** |        |     |     |        |        |
| 25                 | 36-40 | Male   | Pfizer       | detected                         | -112                                                                                                     | -84    | -55    | -28   | 4     | 22    | 56  | 91     | 119    | 168 ** |     |     |        |        |
| 26                 | 46-50 | Female | Moderna      | detected                         | -103                                                                                                     | -75    | -47    | -19   | 9     | 37    | 65  | 95     | 123    | 158    |     |     |        |        |
| 27                 | 26-30 | Female | Pfizer       | detected                         | -68                                                                                                      | -40    | -5     | 23    | 58    | 86    | 114 | 142    |        |        |     |     |        |        |
| 28                 | 46-50 | Male   | Moderna      | detected                         | -144                                                                                                     | -116   | -86    | -57   | -32   | 5     | 12  | 56     |        |        |     |     |        |        |
| 29                 | 41-45 | Female | Pfizer       | detected                         | -147                                                                                                     | -119   | -91    | -63   | -35   | -7    | 28  | 56     |        |        |     |     |        |        |

**Supplementary Table 3. Demographics of seronegative study participants and SIgA induction status**

| Participant number | Age   | Sex    | Vaccine type | SIgA detection after vaccination | Sample collection timepoints in day post first vaccine (*Serum collection only **Saliva collection only) |      |       |      |       |     |     |      |     |        |     |     |     |
|--------------------|-------|--------|--------------|----------------------------------|----------------------------------------------------------------------------------------------------------|------|-------|------|-------|-----|-----|------|-----|--------|-----|-----|-----|
|                    |       |        |              |                                  | -208                                                                                                     | -152 | -124  | -97  | -69   | -41 | -13 | 6    | 43  | 71     | 99  | 127 | 155 |
| 3                  | 56-60 | Male   | Moderna      | non-detected                     | -208                                                                                                     | -152 | -124  | -97  | -69   | -41 | -13 | 6    | 43  | 71     | 99  | 127 | 155 |
| 7                  | 26-30 | Female | Pfizer       | detected                         | -115                                                                                                     | -77  | -35 * | -1   | 20    | 77  | 109 | 139  | 167 | 189 ** |     |     |     |
| 8                  | 36-40 | Female | Pfizer       | non-detected                     | -209                                                                                                     | -153 | -125  | -97  | -69   | -41 | -13 | 43   | 110 | 162 ** |     |     |     |
| 10                 | 61-65 | Female | Moderna      | non-detected                     | -196                                                                                                     | -165 | -112  | -84  | -56 * | -28 | 0   | 26   | 61  | 126    |     |     |     |
| 12                 | 36-40 | Female | Pfizer       | non-detected                     | -241                                                                                                     | -192 | -157  | -129 | -73   | -17 | 16  | 39   | 100 | 124    |     |     |     |
| 13                 | 46-50 | Male   | Pfizer       | detected                         | -156                                                                                                     | -129 | -96   | -67  | -45   | -17 | 13  | 40   | 67  | 89 **  |     |     |     |
| 15                 | 31-35 | Female | Pfizer       | detected                         | -159                                                                                                     | -145 | -61   | -33  | 3     | 24  | 52  | 79   | 107 | 169 ** |     |     |     |
| 18                 | 31-35 | Female | Moderna      | detected                         | -181                                                                                                     | -152 | -125  | -97  | -70   | -40 | -13 | 15   | 42  | 71     |     |     |     |
| 19                 | 26-30 | Female | Moderna      | detected                         | -166                                                                                                     | -151 | -123  | -96  | -68   | -41 | 3   | 44   | 72  | 107    | 156 |     |     |
| 20                 | 36-40 | Female | Moderna      | non-detected                     | -179                                                                                                     | -151 | -123  | -60  | -18   | 4   | 32  | 64   | 155 |        |     |     |     |
| 22                 | 61-65 | Male   | Pfizer       | detected                         | -192                                                                                                     | -164 | -106  | -66  | -24   | 4   | 32  | 60 * | 88  | 115    |     |     |     |
